# Supplementary material for: Microbial Diversity and Quality-Related Physicochemical Properties of Spicy Cabbage in Northeastern China and Their Correlation Analysis
Source: Foods. 2022 May 23;11(10):1511. doi: 10.3390/foods11101511 (PMC9141884; doi:10.3390/foods11101511)
Supplement: Supplementary file 1 [file foods-11-01511-s001.zip › foods-1688262-supplementary.pdf]

Supplementary material

# Microbial Diversity and Quality-Related Physicochemical Properties of Spicy Cabbage in Northeastern China and Their Correlation Analysis

Lixuan Chang <sup>1</sup>, Guangqing Mu <sup>1</sup>, Mingxu Wang <sup>1</sup>, Tong Zhao <sup>2</sup>, Yanfeng Tuo <sup>1</sup>, Xuemei Zhu <sup>1</sup>  
and Fang Qian <sup>1,3,\*</sup>

<sup>1</sup> School of Food Science and Technology, Dalian Polytechnic University, Dalian 116034, China; changlx0824@163.com (L.C.); gq6552002@aliyun.com (G.M.); a571838513@163.com (M.W.); tyfjq@aliyun.com (Y.T.); zhuxuemei2005@hotmail.com (X.Z.)

<sup>2</sup> Dalian Center for Certification and Food and Drug Control, Dalian 116021, China; icp8300@sina.com

<sup>3</sup> School of Food Science and Technology, Dalian Polytechnic University, No. 1 Qinggongyuan, Ganjingzi District, Dalian 116034, China

\* Correspondence: qf09@163.com; Tel.: +86-13130035327; Fax: +86 41186322121

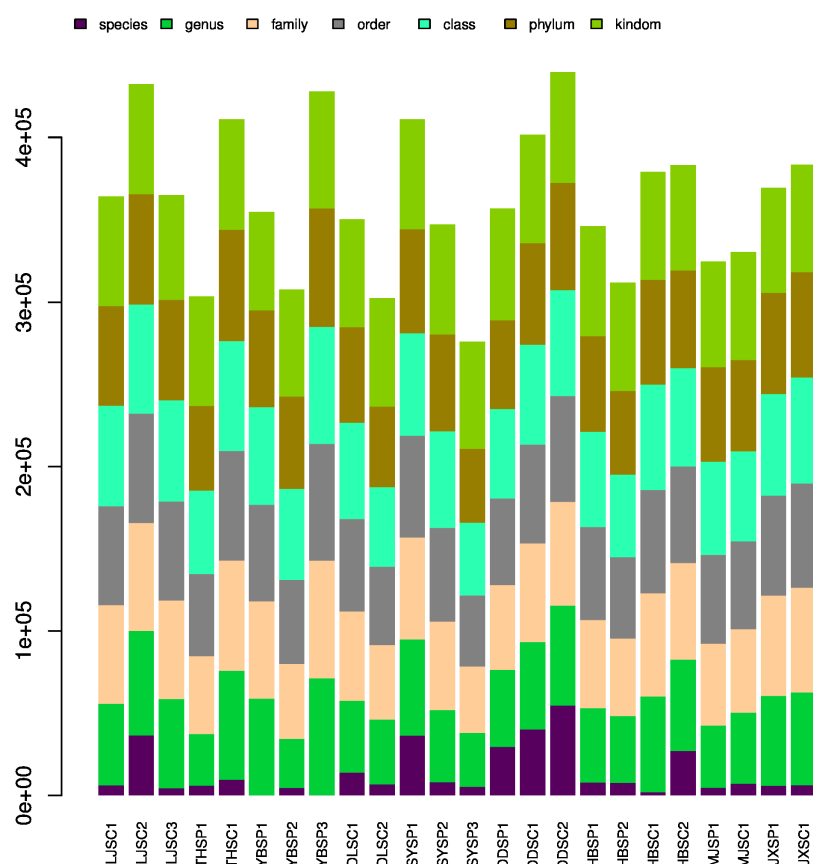

Figure S1. 24 CSC samples annotated under classification level on OTU levelbar plot.

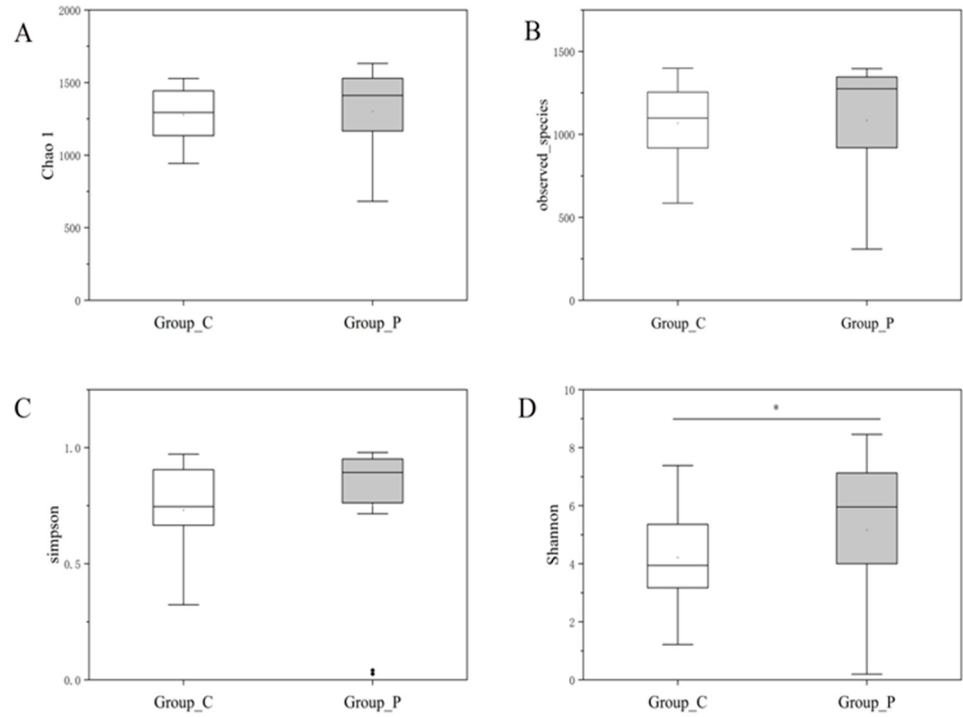

**Figure S2.**  $\alpha$  diversity index of spicy Chinese cabbage samples with different types (Group\_P: retail packaging, Group\_C: home-made). (A) Chao 1; (B) observed\_species; (C) simpson; (D) Shannon. \* denote significant differences ( $p < 0.05$ , T-test, not significant). The box plots show the smallest and largest values, the 10% and 90% quartiles, and the median, mean, and outliers.

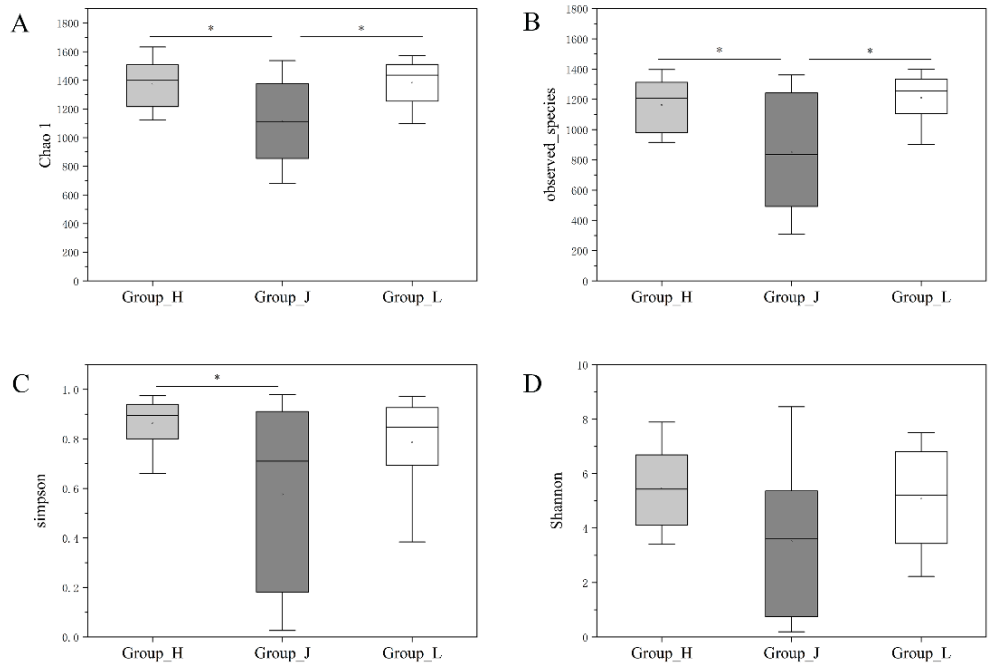

**Figure S3.**  $\alpha$  diversity index of spicy Chinese cabbage samples with different province (Group\_J: Jilin Province, Group\_L: Liaoning Province, and Group\_H: Heilongjiang Province.). (A) Chao 1; (B) observed\_species; (C) simpson; (D) Shannon. \* denote significant differences ( $P < 0.05$ , ANOVA, Duncan-LSD.). The box plots show the smallest and largest values, the 10% and 90% quartiles, and the median, mean, and outliers.

**Table S1.** The gradient elution program.

| <b>elution time/min</b> | <b>mobile phaseA/%</b> | <b>mobile phaseB/%</b> |
|-------------------------|------------------------|------------------------|
| 0                       | 45                     | 55                     |
| 10                      | 45                     | 55                     |
| 15                      | 35                     | 65                     |
| 20                      | 20                     | 80                     |
| 25                      | 20                     | 80                     |
| 30                      | 10                     | 90                     |
| 33                      | 10                     | 90                     |
| 35                      | 45                     | 55                     |
